# Supplementary material
Source: MDPI journal article supplement (https://www.mdpi.com/1996-1073/4/3/458)
Supplement: s1 [file s1]

*Correction*

## **Latest Developments in Numerical Wind Synopsis Prediction Using the RIAM-COMPACT<sup>®</sup> CFD Model—Design Wind Speed Evaluation and Wind Risk (Terrain-Induced Turbulence) Diagnostics in Japan**

*Published: 25 March 2011*

---

A new version of the paper [1] was uploaded today. A mistake for Figures 2 and 3 was corrected. We would like to apologize for any inconvenience caused to our readers.

*Energies* Editorial Office

### **References**

1. Uchida, T.; Ohya, Y. Latest Developments in Numerical Wind Synopsis Prediction Using the RIAM-COMPACT<sup>®</sup> CFD Model—Design Wind Speed Evaluation and Wind Risk (Terrain-Induced Turbulence) Diagnostics in Japan. *Energies* **2011**, *4*, 458–474.
